# Supplementary material for: Detection of Canine Vector-Borne Filariasis and Their Wolbachia Endosymbionts in French Guiana
Source: PubMed Central journal article supplement (PMC7285362; doi:10.3390/microorganisms8050770), 2020-05-21
Supplement: microorganisms-08-00770-s001.pdf [file microorganisms-08-00770-s001.pdf]

| Dilution | 18S              |                  | Cox1             |                  | 12S              |                  |
|----------|------------------|------------------|------------------|------------------|------------------|------------------|
|          | R-1              | R-2              | R-1              | R-2              | R-1              | R-2              |
| 1/400    | Pos <sup>a</sup> | Pos.             | Pos <sup>a</sup> | Pos              | Pos <sup>a</sup> | Pos <sup>a</sup> |
| 1/800    | Pos <sup>a</sup> | Pos <sup>a</sup> | Pos <sup>a</sup> | Pos <sup>a</sup> | Pos <sup>a</sup> | Pos <sup>a</sup> |
| 1/1600   | N/A              | Pos <sup>b</sup> | N/A              | Pos <sup>b</sup> | N/A              | N/A              |

Pos: Sample positive by PCR. a: *A. reconditum*. b: *Brugia* sp. N/A: No amplification, R-1 and R-2 represents duplicate 1 and 2 respectively.

**Table S1.** PCR/Sequencing results of the 18S, cox1 and 12S genes from a filarial co-infected sample (CMT1) after microfilaria separation using a serial 2-fold dilution of blood.
